# Supplementary material for: Potential Health Benefits of Banana Phenolic Content during Ripening by Implementing Analytical and In Silico Techniques
Source: MDPI journal article supplement (doi:10.3390/life13020332), 2023-01-25
Supplement: s1 [file s1]

### Optimization of MS parameters

Flow injection analysis (FIA) of 10 µg/mL from each compound was conducted for source optimization. The parameters for EMS and IDA experiments are mentioned above.

**Table S1.** Parameters of EMS and IDA experiments.

| Parameters                        | EMS     | IDA-EPI                |
|-----------------------------------|---------|------------------------|
| Mass range (m/z)                  | 100-700 | 50-700                 |
| Scan period (s)                   | 0.1513  |                        |
| Number of scans                   | 3       | 1                      |
| Scan rate (amu/s)                 | 4000    | 1000                   |
| Curtain gas                       | 30      | 30                     |
| CAD gas                           | Medium  | High                   |
| Temperature (°C)                  | 550     | 550                    |
| Gas 1                             | 45      | 45                     |
| Gas 2                             | 45      | 45                     |
| Ion spray                         | -4500   | -4500                  |
| Declustering potential            | -30     | -30                    |
| Entrance potential                | -7.5    | -7.5                   |
| Collision energy                  | -10     | -30                    |
| C2B                               | -300    | -450                   |
| IPA threshold for EPI experiments |         | 10000 counts           |
| Peak selected for the EPI scan    |         | Two most intense peaks |
| Q1 resolution                     |         | Low                    |
| Collision energy spray            |         | 10                     |

**Table S2.** Molecular target prediction probability values of examined phenolic compounds, derived from the application of open web-based tools Random Forest QSAR (<http://rfqsar.kaist.ac.kr/home.php>) (accessed on 1 December 2022) and Swiss Target Prediction (<http://www.swisstargetprediction.ch/>) (accessed on 1 December 2022).

| Compounds        | Probability Value<br>Random Forest QSAR |         | Probability Value<br>Swiss Target Prediction |         |
|------------------|-----------------------------------------|---------|----------------------------------------------|---------|
|                  | hCA-II                                  | hCA-XII | hCA-II                                       | hCA-XII |
| Apigenin         | 0.74                                    | 0.75    | 0.56                                         | 0.56    |
| Caffeic acid     | 0.80                                    | 0.82    | 0.74                                         | 0.74    |
| Chlorogenic acid | 0.05                                    | -       | 0.10                                         | 0.10    |
| Kaempferol       | 0.83                                    | 0.83    | 1.00                                         | 1.00    |
| Naringenin       | -                                       | 0.80    | 0.10                                         | 0.91    |
| Quercetin        | 0.83                                    | 0.84    | 1.00                                         | 1.00    |
| Rosmarinic acid  | 0.65                                    | 0.69    | 0.17                                         | 0.12    |
| Syringic acid    | 0.80                                    | 0.82    | 1.00                                         | 1.00    |

**Table S3.** Results of total phenolic content (TPC), antiradical (ABTS) and antioxidant activity (FRAP) of banana flesh samples during storage at 18.0±0.5 °C.

| Days | Total Phenolic Content (TPC) (mg<br>GAE / g of banana flesh) | Antiradical activity<br>(ABTS) (mg TE / g of<br>banana flesh) | Antioxidant activity (FRAP)<br>(mg Fe(II) / g of banana flesh) |
|------|--------------------------------------------------------------|---------------------------------------------------------------|----------------------------------------------------------------|
| 2    | 0.309±0.063a                                                 | 0.971±0.080a                                                  | 2.846±0.275a                                                   |
| 4    | 0.157±0.053bc                                                | 0.405±0.070b                                                  | 1.507±0.273be                                                  |
| 7    | 0.118±0.020b                                                 | 0.385±0.036b                                                  | 1.195±0.105c                                                   |
| 9    | 0.122±0.027bc                                                | 0.407±0.036b                                                  | 1.324±0.121cb                                                  |
| 11   | 0.152±0.020bc                                                | 0.408±0.047b                                                  | 1.416±0.147cbd                                                 |
| 14   | 0.180±0.026c                                                 | 0.444±0.024bc                                                 | 1.620±0.127de                                                  |
| 17   | 0.384±0.037d                                                 | 0.500±0.041c                                                  | 1.649±0.166de                                                  |
| 21   | 0.467±0.043e                                                 | 0.578±0.061d                                                  | 1.762±0.196e                                                   |

a-e: Different letters in the results of each analysis indicate that the values of the samples differ significantly.

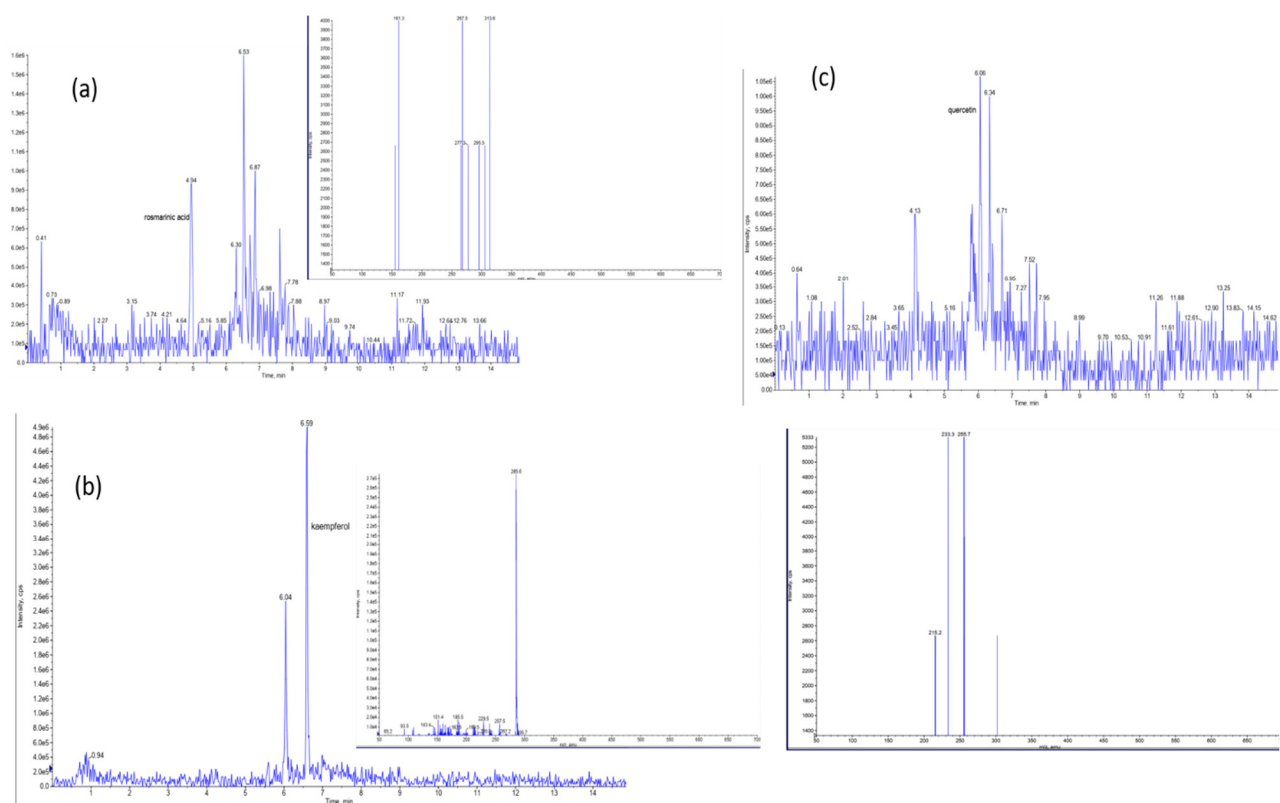

**Figure S1.** Representative chromatographs and EMS mass spectra of indicative elucidated compounds. (a) rosmarinic acid; (b) kaempferol; (c) quercetin.
